# Supplementary material for: Opposite effects of stress on effortful motivation in high and low anxiety are mediated by CRHR1 in the VTA
Source: PubMed Central journal article supplement — Sci Adv. 2022 Mar 23;8(12):eabj9019. doi: 10.1126/sciadv.abj9019 (PMC8942367; doi:10.1126/sciadv.abj9019), 2022-03-23
Supplement: sciadv.abj9019_sm.pdf [file sciadv.abj9019_sm.pdf]

Supplementary Materials for  
**Opposite effects of stress on effortful motivation in high and low anxiety are mediated by CRHR1 in the VTA**

Ioannis Zalachoras\*, Simone Astori\*, Mandy Meijer, Jocelyn Grosse, Olivia Zanoletti,  
Isabelle Guillot de Suduiraut, Jan M. Deussing, Carmen Sandi\*

\*Corresponding author. Email: carmen.sandi@epfl.ch (C.S.); izalacho@hotmail.com (I.Z.);  
simone.astori@epfl.ch (S.A.)

Published 23 March 2022, *Sci. Adv.* **8**, eabj9019 (2022)  
DOI: 10.1126/sciadv.abj9019

**The PDF file includes:**

Figs. S1 to S6  
Tables S1 and S2

**Other Supplementary Material for this manuscript includes the following:**

Source data

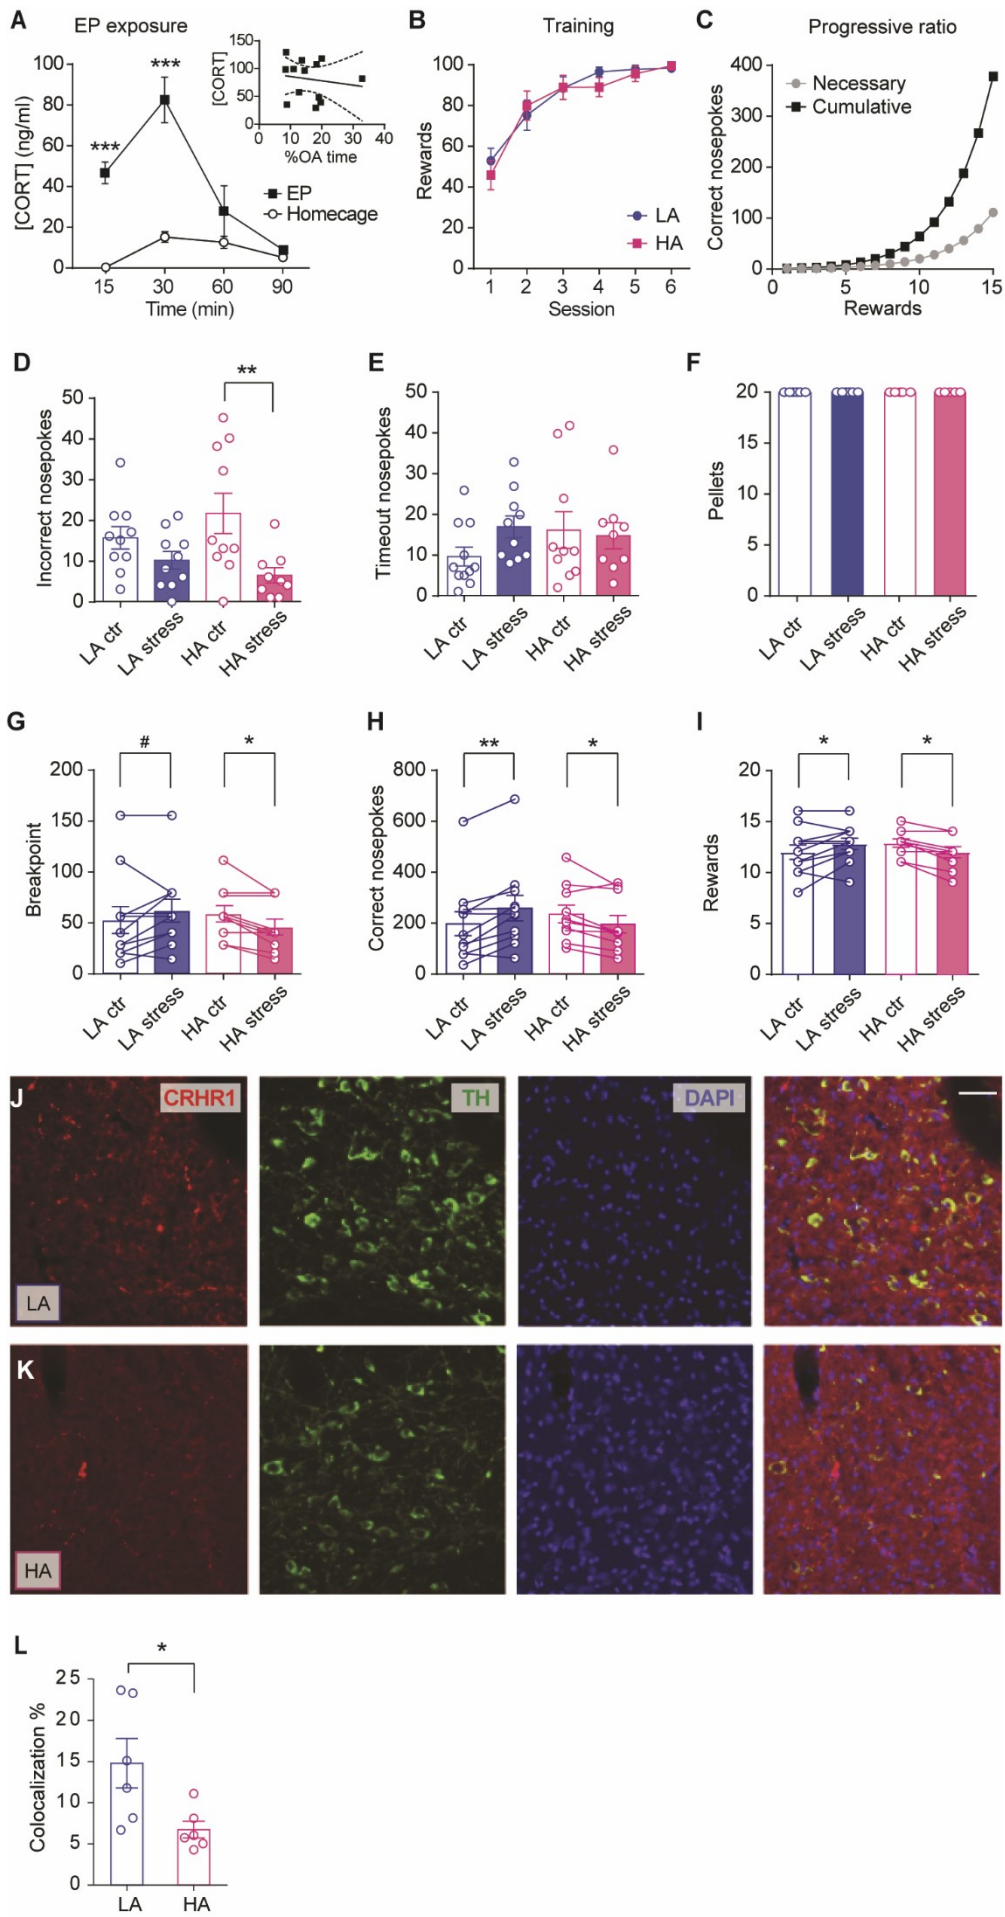

**Fig. S1. Additional data on progressive ratio test performance. (A)** Plasma corticosterone (CORT) levels at different time points following rats' exposure to the elevated platform (EP, n = 11) and in non-stressed rats in which blood samples were taken at equivalent time points (home cage, n = 8). Two-way ANOVA showed a significant effect of stress ( $F_{(1,17)} = 22.49$ ,  $p = 0.0002$ ), a significant effect of time ( $F_{(3,51)} = 14.07$ ,  $p < 0.001$ ) and a significant interaction ( $F_{(3,51)} = 9.728$ ,  $p < 0.0001$ ). Insert, lack of correlation between peak CORT response and trait anxiety, as measured by % of time spent in the open arm (OA) of the elevated plus maze ( $r = -0.149$ ,  $p = 0.628$ ), supporting the view that all animals are stressed regardless their individual anxiety levels. **(B)** No difference in training performance was observed between LA and HA rats involved in stress experiments. Two-way repeated measures ANOVA revealed a non-significant session x anxiety interaction ( $F_{(5,190)} = 0.6091$ ,  $p = 0.693$ ), a non-significant effect of anxiety ( $F_{(1,38)} = 0.105$ ,  $p = 0.748$ ) and a significant effect of session ( $F_{(5,190)} = 36.00$ ,  $p < 0.001$ ). **(C)** Necessary (the number of nosepokes rats needed to carry out after acquiring the previous reward in order to acquire the next one) and cumulative nosepokes (all nosepokes rats needed to perform from the beginning of the task to reach each reward) for each reward in the PR test. **(D)** Two-way ANOVA showed a non-significant interaction effect ( $F_{(1,36)} = 2.378$ ,  $p = 0.132$ ), a non-significant effect of anxiety ( $F_{(1,36)} = 0.145$ ,  $p = 0.705$ ) and a significant effect of stress ( $F_{(1,36)} = 10.70$ ,  $p = 0.0024$ ) on the number of incorrect nosepokes performed. **(E)** Two-way ANOVA showed a non-significant interaction effect ( $F_{(1,34)} = 0.9755$ ,  $p = 0.330$ ), a non-significant effect of anxiety ( $F_{(1,34)} = 0.729$ ,  $p = 0.399$ ) and a non-significant effect of stress ( $F_{(1,34)} = 0.312$ ,  $p = 0.580$ ) on the number of timeout nosepokes. **(F)** All rats consumed 20 pellets when they were given access to them in a home cage-like environment, regardless of stress exposure, intra-VTA treatment or anxiety levels. **(G-I)** When the same rats were used for both conditions (control-stress) for the PR test session, the observed effect resembled the stress effect seen when rats were used either as controls or after stress exposure. **(G)** Two-way repeated measures ANOVA revealed a significant stress x anxiety interaction ( $F_{(1,19)} = 9.949$ ,  $p = 0.0052$ ), a non-significant effect of anxiety ( $F_{(1,19)} = 0.117$ ,  $p = 0.736$ ) and a non-significant effect of stress ( $F_{(1,19)} = 0.2786$ ,  $p = 0.604$ ) on breakpoint. **(H)** Two-way repeated measures ANOVA revealed a significant stress x anxiety interaction ( $F_{(1,19)} = 25.57$ ,  $p < 0.0001$ ), a non-significant effect of anxiety ( $F_{(1,19)} = 0.043$ ,  $p = 0.8384$ ) and a non-significant effect of stress ( $F_{(1,19)} = 1.175$ ,  $p = 0.2919$ ) on the number of correct nosepokes performed. **(I)** Two-way repeated measures ANOVA revealed a significant stress x anxiety interaction ( $F_{(1,19)} = 13.04$ ,  $p = 0.0019$ ), a non-significant effect of anxiety ( $F_{(1,19)} = 0.003$ ,  $p = 0.958$ ) and a non-significant effect of stress ( $F_{(1,19)} = 0.0296$ ,  $p = 0.865$ ) on the number of obtained rewards. **(J-K)** Expression of CRHR1 protein (red) in TH<sup>+</sup> cells (green) (DA neurons), along with nuclear staining with DAPI (blue) and merged image in the VTA of LA **(J)** and HA rats **(K)**. **(L)** LA rats had higher CRHR1 protein expression in DA neurons than HA rats (two-tailed t-test,  $t_{(10)} = 2.546$ ,  $p = 0.029$ ). Asterisks denote significant differences at respective t-tests or post-hoc tests (\*\*\*,  $p < 0.001$ , \*\*,  $p < 0.01$ , \*,  $p < 0.05$ , #,  $p < 0.1$ ).

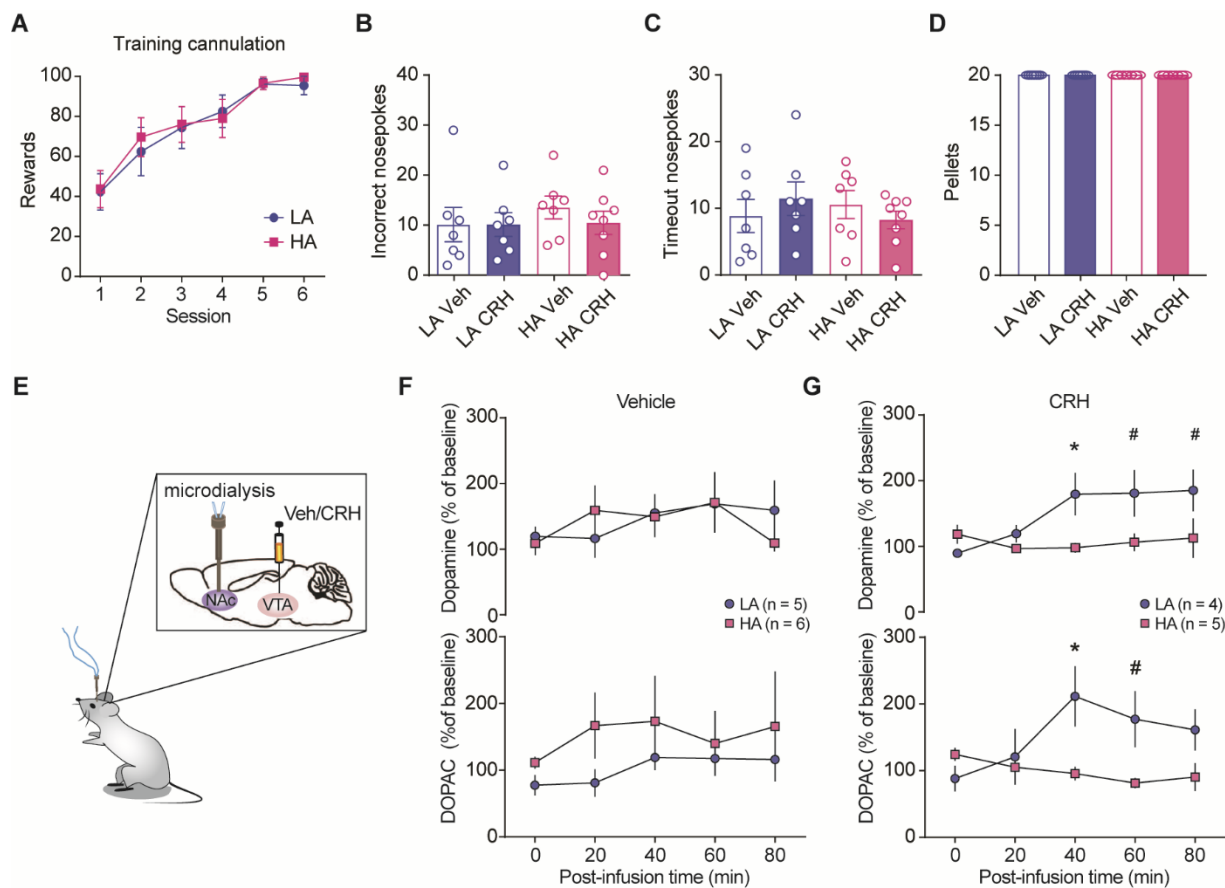

**Fig. S2. Effects of intra-VTA CRH treatment on progressive ratio test performance and NAc DA release.**

**(A)** No difference in training performance was observed between cannulated LA and HA rats. Two-way repeated measures ANOVA revealed a non-significant session x anxiety interaction ( $F_{(5,135)} = 0.162$ ,  $p = 0.976$ ), a non-significant effect of anxiety ( $F_{(1,27)} = 0.055$ ,  $p = 0.817$ ) and a significant effect of session ( $F_{(5,135)} = 20.45$ ,  $p < 0.001$ ) in cannulated rats. **(B)** Two-way ANOVA showed a non-significant anxiety x treatment interaction effect ( $F_{(1,25)} = 0.342$ ,  $p = 0.564$ ), a non-significant effect of anxiety ( $F_{(1,25)} = 0.519$ ,  $p = 0.478$ ) and a non-significant effect of treatment ( $F_{(1,25)} = 0.342$ ,  $p = 0.564$ ) on the number of incorrect nose-pokes. **(C)** Two-way ANOVA showed a non-significant anxiety x treatment interaction effect ( $F_{(1,25)} = 1.335$ ,  $p = 0.259$ ), a non-significant effect of anxiety ( $F_{(1,25)} = 0.12$ ,  $p = 0.732$ ) and a non-significant effect of treatment ( $F_{(1,25)} = 0.003$ ,  $p = 0.9531$ ) on the number of timeout nose-pokes. **(D)** All rats consumed all 20 pellets when they were given free access to them, regardless of anxiety or treatment. **(E)** Scheme for measurement of DA and DOPAC release in the NAc following intra-VTA treatment with vehicle or CRH. **(F)** Two-way ANOVA revealed no difference in DA and DOPAC release following intra-VTA vehicle treatment in HA and LA rats (DA: Interaction:  $F_{(4,36)} = 1.177$ ,  $p = 0.338$ , anxiety:  $F_{(1,9)} = 0.014$ ,  $p = 0.908$ , time:  $F_{(4,36)} = 1.870$ ,  $p = 0.133$ ; DOPAC: interaction:  $F_{(4,36)} = 0.425$ ,  $p = 0.79$ , anxiety:  $F_{(1,9)} = 0.757$ ,  $p = 0.407$ , time:  $F_{(4,36)} = 1.197$ ,  $p = 0.329$ );  $n = 5-6$  per group. **(G)** Effects of intra-VTA CRH treatment on NAc DA and DOPAC release. LA rats had higher DA and DOPAC release in the NAc compared to HA rats. DA: Two-way ANOVA revealed a significant anxiety effect ( $F_{(1,7)} = 9.406$ ,  $p = 0.018$ ) and a marginally non-significant anxiety x time interaction ( $F_{(4,28)} = 2.589$ ,  $p = 0.058$ ). DOPAC: Two-way ANOVA revealed a significant anxiety x time interaction ( $F_{(4,28)} = 6.302$ ,  $p = 0.001$ ) and a non-significant anxiety effect ( $F_{(1,7)} = 3.132$ ,  $p = 0.12$ );  $n = 4-5$  per group. (\*,  $p < 0.05$ , #,  $p \leq 0.07$ ).

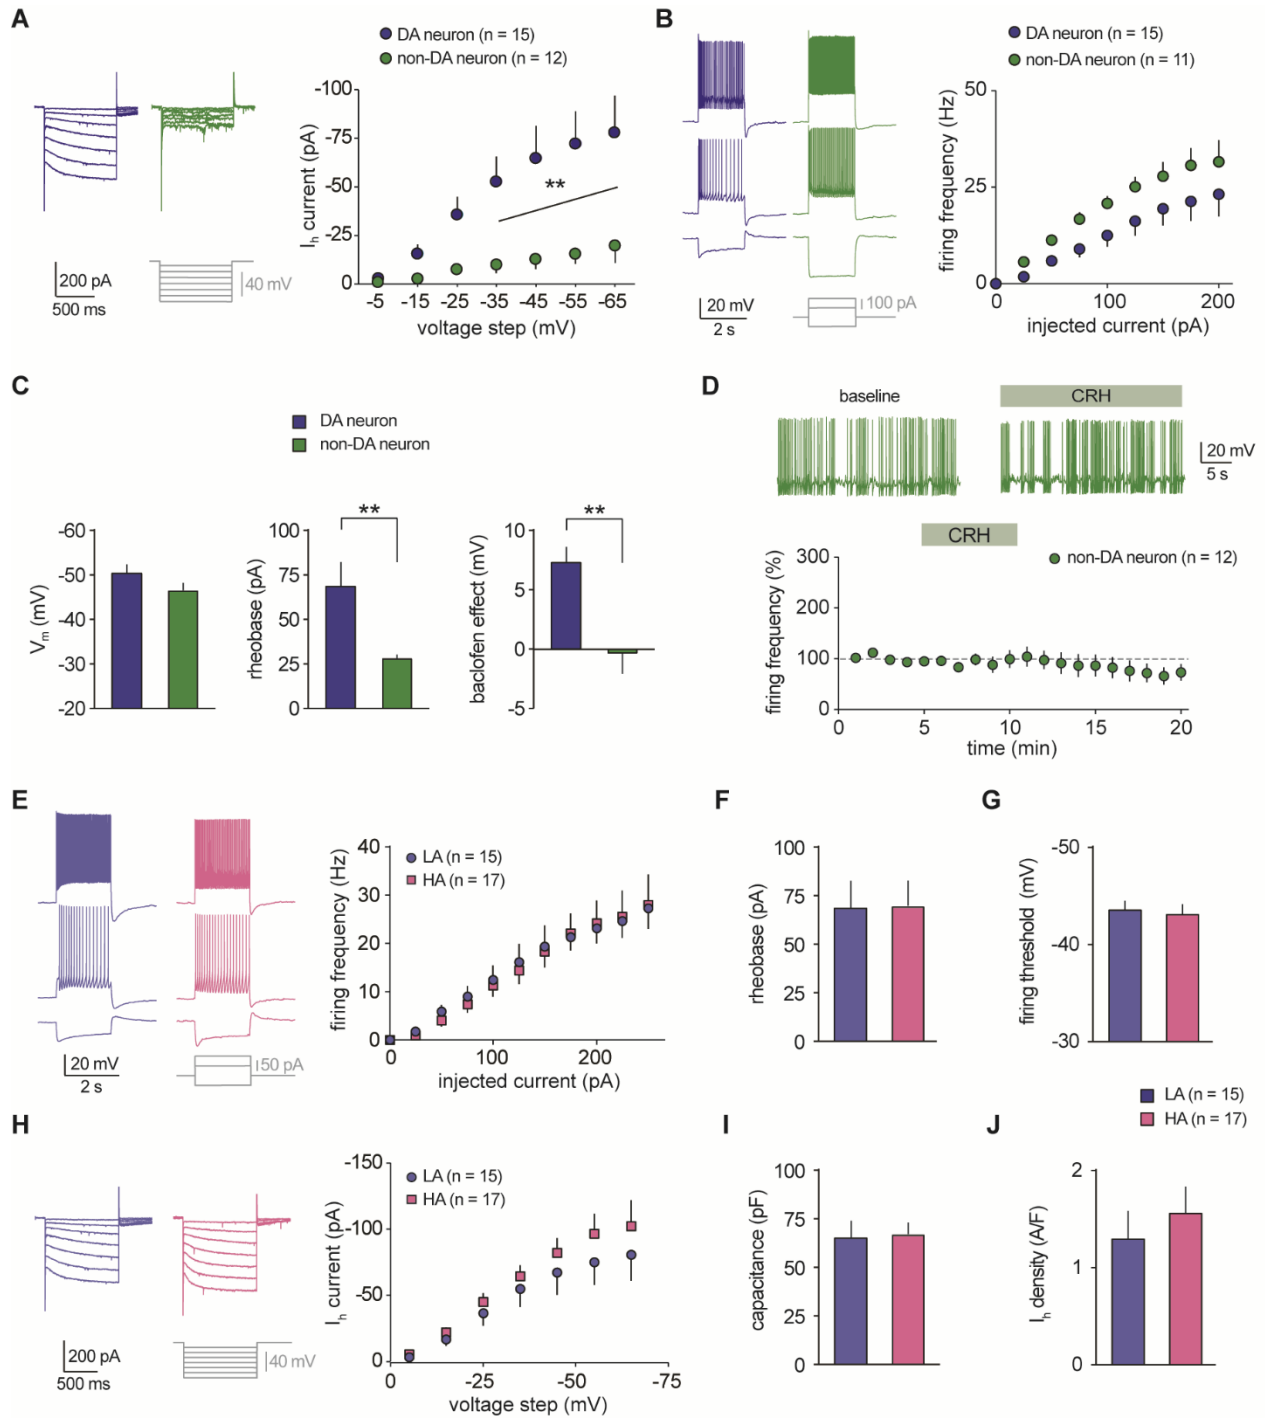

**Fig. S3. Additional data on DA VTA firing.** (A) Hyperpolarization-activated currents ( $I_h$ ) induced by negative voltage steps in putative DA and non-DA neurons in the VTA (Two-way ANOVA for factor cell type,  $F_{(1,172)} = 38.87$ ,  $p < 0.0001$ ). Representative color-coded traces and voltage protocol are shown on the left. (B) Frequency-current (F-I) curves of cell firing evoked by 2-s-long somatic current injections in putative DA and non-DA VTA neuron (Two-way ANOVA for factor cell type,  $F_{(1,216)} = 17.71$ ,  $p < 0.0001$ ). Color-coded traces on the left are representative voltage responses elicited by -100 pA, 100 pA and 200 pA current steps. (C) Membrane potential ( $V_m$ , two tailed t-test,  $t_{(24,79)} = 1.512$ ,  $p = 0.143$ ), rheobase (Mann-Whitney test,  $U = 38$ ,  $p = 0.0087$ ) and hyperpolarization induced by GABA<sub>B</sub>R-activation (baclofen effect,

Mann-Whitney test,  $U = 17$ ,  $p = 0.0012$ ) in putative DA and non-DA VTA cells. **(D)** Lack of effect on spontaneous firing of non-DA VTA neurons upon batch application of CRH (500 nM). **(E)** Frequency-current (F-I) curves of cell firing evoked by 2-s-long somatic current injections in DA VTA neurons from LA and HA rats held at -60 mV (Two-way ANOVA for factor anxiety,  $F_{(1,330)} = 0.08$ ,  $p = 0.776$ ). Color-coded traces on the left are representative voltage responses elicited by -50 pA, 50 pA and 100 pA current steps. **(F-G)** Rheobase and threshold of evoked firing did not differ between LA and HA rats (LA,  $n = 15$  vs. HA,  $n = 17$ ;  $p = 0.81$  for rheobase and  $p = 0.86$  for threshold). **(H)**  $I_h$  currents in DA VTA neurons from LA and HA rats (Two-way ANOVA for factor anxiety,  $F_{(1,209)} = 4.658$ ,  $p = 0.03$ ; Fisher's LSD post-hoc comparison  $p > 0.05$ ). Representative traces and voltage protocol are shown on the left. **(I-J)** Cell capacitance and  $I_h$  density (maximal  $I_h$  current normalized by cell capacitance) did not differ between LA and HA rats ( $p = 0.53$  for capacitance and  $p = 0.20$  for  $I_h$  density). (\*\*,  $p < 0.01$ ).

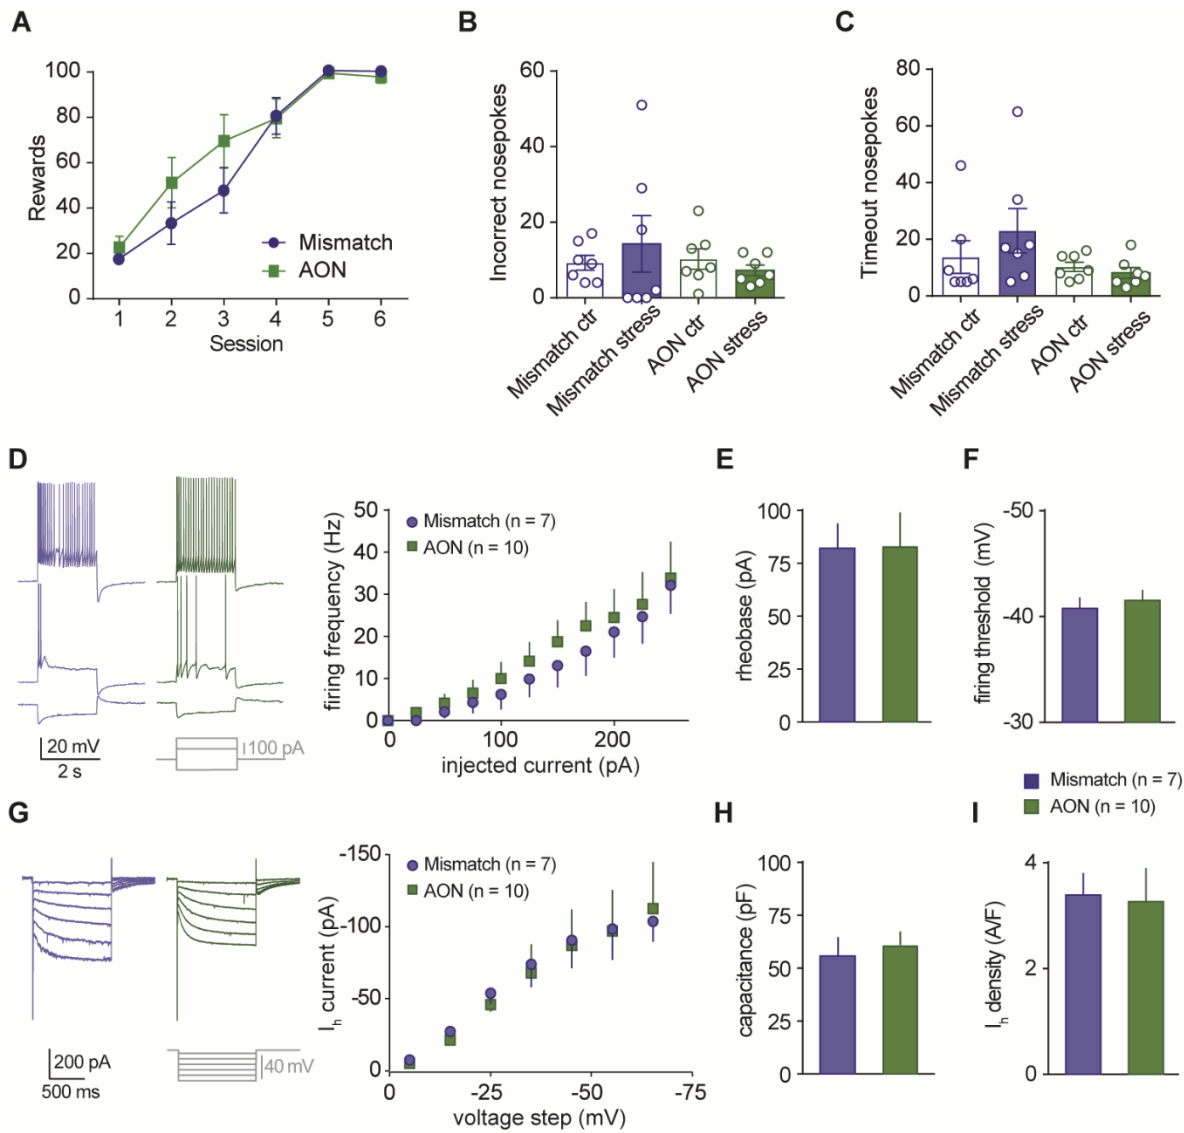

**Fig. S4. Additional data on progressive ratio test performance in AON-treated rats. (A)** Training performance was similar between the mismatch-treated and the AON-treated groups (Two-way repeated measures ANOVA: interaction effect  $F_{(5,130)} = 1.486$ ,  $p = 0.199$ , AON effect  $F_{(1,26)} = 1.117$ ,  $p = 0.300$ , Time effect  $F_{(5,130)} = 54.87$ ,  $p < 0.0001$ ). **(B)** No difference was observed between groups in incorrect nose-pokes, regardless of AON treatment or stress exposure (Two-way ANOVA: interaction effect:  $F_{(1,24)} = 0.931$ ,  $p = 0.344$ , AON effect  $F_{(1,24)} = 0.524$ ,  $p = 0.476$ , Stress effect  $F_{(1,24)} = 0.058$ ,  $p = 0.81$ ). **(C)** No difference was observed between groups in timeout nose-pokes, regardless of AON treatment or stress exposure (Two-way ANOVA: interaction effect  $F_{(1,24)} = 1.291$ ,  $p = 0.267$ , AON effect  $F_{(1,24)} = 3.306$ ,  $p = 0.082$ , Stress effect  $F_{(1,24)} = 0.505$ ,  $p = 0.484$ ). **(D)** Frequency-current (F-I) curves of cell firing evoked by 2-s-long somatic current injections in DA VTA neurons from mismatch-treated and AON-treated rats held at  $-60$  mV (Two-way ANOVA for factor treatment,  $F_{(1,163)} = 2.042$ ,  $p = 0.155$ ). Color-coded traces on the left are representative voltage responses elicited by  $-100$  pA,  $100$  pA and  $200$  pA current steps. **(E-F)** Rheobase and threshold of evoked firing did not differ between groups (mismatch,  $n = 7$  vs. AON,  $n = 10$ ;  $p = 0.98$  for rheobase and  $p = 0.62$  for threshold). **(G)**  $I_h$  currents in DA VTA neurons from mismatch-treated and AON-treated rats (Two-way ANOVA for factor treatment,  $F_{(1,103)} = 0.024$ ,  $p = 0.877$ ). Representative traces and voltage protocol are shown on the left. **(H-I)** Cell capacitance and  $I_h$  density (maximal  $I_h$  current normalized by cell capacitance) did not differ between groups ( $p = 0.88$  for capacitance and  $p = 0.15$  for  $I_h$  density).



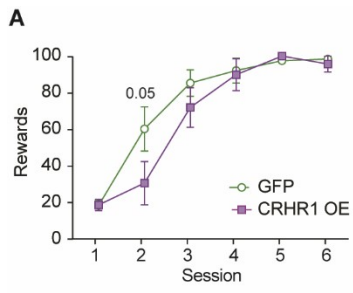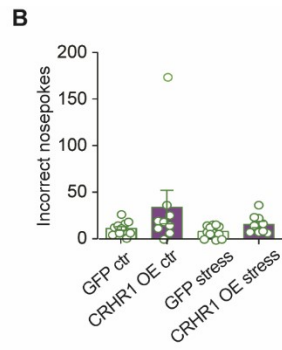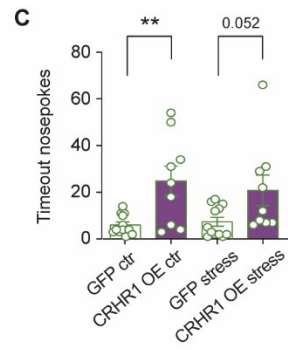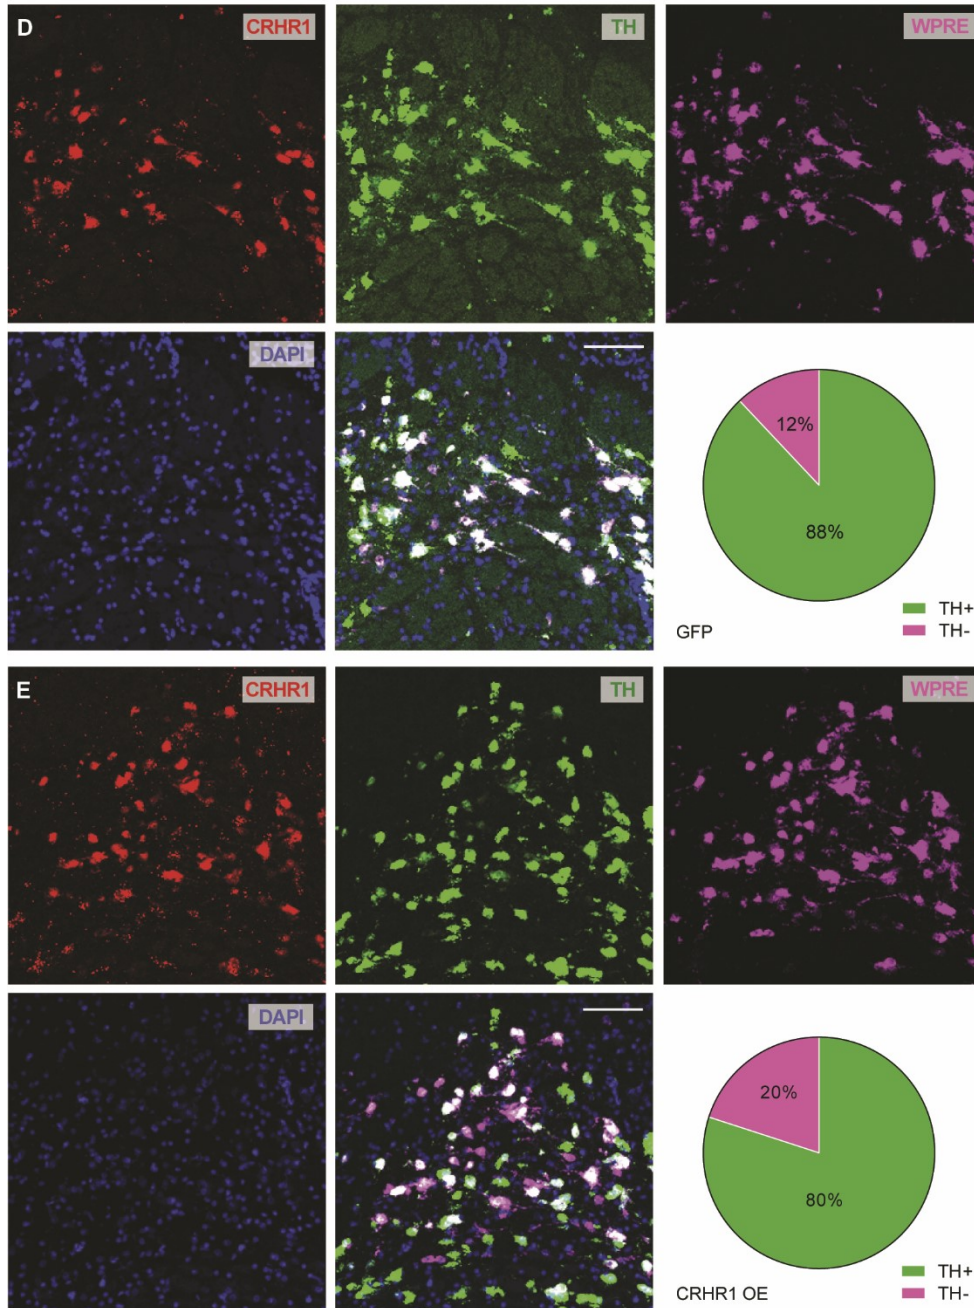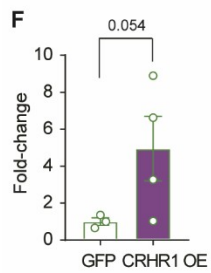



**Fig. S5. Additional data on the effects of CRHR1 OE on PR test performance. (A)** CRHR1 OE and GFP rats did not differ in their training performance (session x treatment interaction,  $F_{(5,95)} = 1.580$ ,  $p = 0.173$ , treatment effect,  $F_{(1,19)} = 2.839$ ,  $p = 0.108$ , session effect,  $F_{(5,95)} = 45.68$ ,  $p < 0.001$ ). **(B)** There was no difference in the number of incorrect nose pokes between GFP and CRHR1 OE rats (Two-way repeated measures ANOVA, treatment x stress interaction:  $F_{(1,19)} = 1.057$ ,  $p = 0.3168$ ; stress effect:  $F_{(1,19)} = 2.059$ ,  $p = 0.1675$ ; treatment effect:  $F_{(1,19)} = 3.238$ ,  $p = 0.0878$ ). **(C)** CRHR1 OE rats performed more timeout nose pokes than GFP rats (Two-way repeated measures ANOVA, treatment x stress interaction:  $F_{(1,19)} = 0.840$ ,  $p = 0.3709$ ; stress effect:  $F_{(1,19)} = 0.210$ ,  $p = 0.652$ ; treatment effect:  $F_{(1,19)} = 10.19$ ,  $p = 0.0048$ )(\*\*,  $p < 0.01$ ). **(D-E)** Representative images of viral expression in TH+ cells in the VTA of GFP **(D)** and CRHR1 OE rats **(E)** (scale bar = 50  $\mu\text{m}$ ). Quantification of viral expression in TH+ cells. In both groups >80 % of WPRE+ cells were TH+, 88% in the GFP rats and 80% in the CRHR1 OE rats. **(F)** Treatment with the CRHR1 OE virus resulted in marginally non-significant upregulation of CRHR1 expression in DA neurons (one-tailed t-test  $t_{(3.080)} = 2.248$ ,  $p = 0.054$ ).

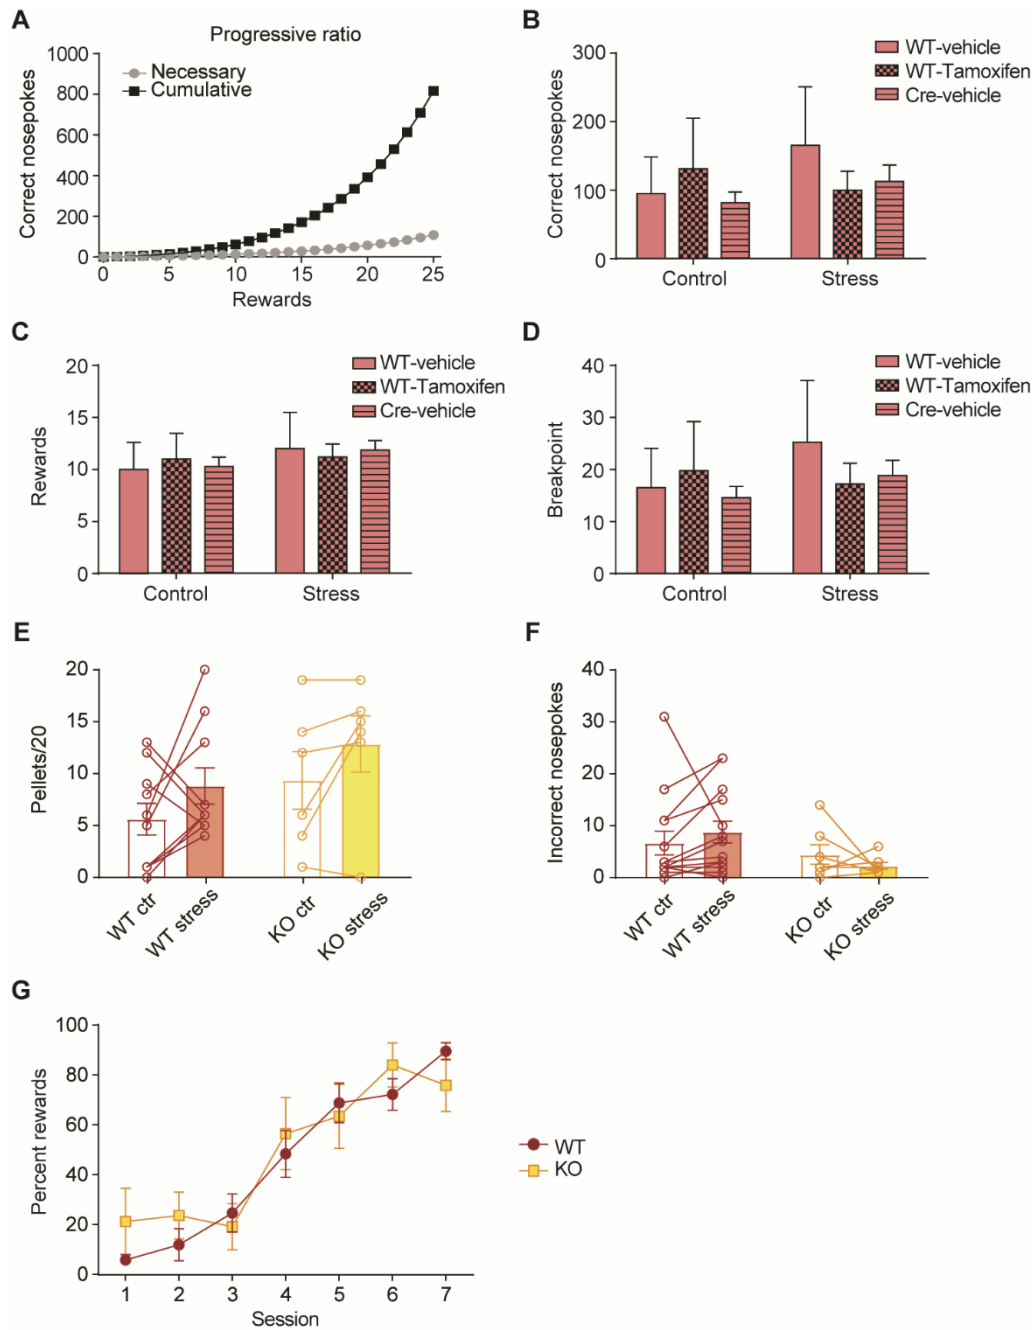

**Fig. S6. Additional data on the effects of CRHR1 deletion in DA neurons in mice on PR test performance.** (A) Necessary and cumulative nosepekes for each reward in the progressive ratio test for mice. (B) No difference between wild type groups ('WT-vehicle': Cre<sup>-</sup> vehicle-treated; 'WT-Tamoxifen': Cre<sup>-</sup> tamoxifen-treated; 'Cre-vehicle': DAT-CRHR1 vehicle-treated mice) under control conditions or after stress in the number of correct nosepekes (Two-way ANOVA, group effect  $F_{(2,13)} = 0.166$ ,  $p = 0.849$ ). (C) No difference between wild type groups was observed under control conditions or after stress in the number of rewards (Two-way ANOVA, group effect  $F_{(2,26)} = 0.0013$ ,  $p = 0.999$ ). (D) No difference between wild type groups was observed under control conditions or after stress in the breakpoint reached (Two-way ANOVA, group effect  $F_{(2,13)} = 0.1381$ ,  $p = 0.872$ ). (E) Number of pellets consumed out of 20, when WT and DAT-CRHR1 (KO) mice were allowed to freely eat them in a home cage-like setting. No significant stress x genotype interaction ( $F_{(1,14)} = 0.009$ ,  $p = 0.926$ ), no significant effect of genotype ( $F_{(1,14)} = 2.368$ ,  $p = 0.146$ ) and a

marginally non-significant effect of stress were observed ( $F_{(1,14)} = 4.471$ ,  $p = 0.053$ ). **(F)** No difference was observed in the number of incorrect nose pokes between genotypes, or between control and stress. No significant interaction ( $F_{(1,19)} = 1.641$ ,  $p = 0.216$ ), genotype ( $F_{(1,19)} = 2.384$ ,  $p = 0.14$ ) or stress ( $F_{(1,19)} = 0.0$ ,  $p > 0.99$ ) effects were observed. **(G)** Two-way repeated measures ANOVA revealed a significant effect of session ( $F_{(6,147)} = 22.31$ ,  $p < 0.0001$ ), but no effect of genotype ( $F_{(1,147)} = 0.468$ ,  $p = 0.495$ ) or interaction effect ( $F_{(6,147)} = 0.8025$ ,  $p = 0.5695$ ) in training performance.

| Figure | Variable            | Test details                   | Mean 1 | Mean 2 | Mean Diff. | SE of diff. | N1 | N2 | t      | DF | P Value Holm-Sidak's test |
|--------|---------------------|--------------------------------|--------|--------|------------|-------------|----|----|--------|----|---------------------------|
| 1C     | breakpoint          | LA ctr vs. HA ctr              | 51.64  | 67.9   | -16.26     | 11.22       | 11 | 10 | 1.45   | 36 | 0.1557                    |
|        |                     | LA ctr vs. LA stress           | 51.64  | 86.5   | -34.86     | 11.22       | 11 | 10 | 3.109  | 36 | 0.0111                    |
|        |                     | HA ctr vs. HA stress           | 67.9   | 38.78  | 29.12      | 11.79       | 10 | 9  | 2.469  | 36 | 0.0363                    |
|        |                     | LA stress vs. HA stress        | 86.5   | 38.78  | 47.72      | 11.79       | 10 | 9  | 4.046  | 36 | 0.0012                    |
| 1D     | correct nosepones   | LA ctr vs. HA ctr              | 214.3  | 272.8  | -58.53     | 45.33       | 11 | 10 | 1.291  | 36 | 0.2048                    |
|        |                     | LA ctr vs. LA stress           | 214.3  | 342.2  | -127.9     | 45.33       | 11 | 10 | 2.822  | 36 | 0.023                     |
|        |                     | HA ctr vs. HA stress           | 272.8  | 169.6  | 103.2      | 47.66       | 10 | 9  | 2.166  | 36 | 0.0731                    |
|        |                     | LA stress vs. HA stress        | 342.2  | 169.6  | 172.6      | 47.66       | 10 | 9  | 3.622  | 36 | 0.0035                    |
| 1E     | rewards             | LA ctr vs. HA ctr              | 12.45  | 13.2   | -0.7455    | 0.6019      | 11 | 10 | 1.238  | 36 | 0.2236                    |
|        |                     | LA ctr vs. LA stress           | 12.45  | 14     | -1.545     | 0.6019      | 11 | 10 | 2.567  | 36 | 0.0432                    |
|        |                     | HA ctr vs. HA stress           | 13.2   | 11.67  | 1.533      | 0.633       | 10 | 9  | 2.422  | 36 | 0.0407                    |
|        |                     | LA stress vs. HA stress        | 14     | 11.67  | 2.333      | 0.633       | 10 | 9  | 3.686  | 36 | 0.0027                    |
| 3B     | breakpoint          | LA Veh vs. HA Veh              | 31.71  | 69.75  | -38.04     | 12.97       | 7  | 8  | 2.933  | 26 | 0.0206                    |
|        |                     | LA Veh vs. LA CRH              | 31.71  | 81     | -49.29     | 13.4        | 7  | 7  | 3.679  | 26 | 0.0043                    |
|        |                     | HA Veh vs. HA CRH              | 69.75  | 43.38  | 26.38      | 12.53       | 8  | 8  | 2.105  | 26 | 0.0451                    |
|        |                     | LA CRH vs. HA CRH              | 81     | 43.38  | 37.63      | 12.97       | 7  | 8  | 2.901  | 26 | 0.015                     |
| 3C     | correct nosepones   | LA Veh vs. HA Veh              | 132.3  | 329.1  | -196.9     | 50.37       | 7  | 7  | 3.908  | 26 | 0.0024                    |
|        |                     | LA Veh vs. LA CRH              | 132.3  | 262.8  | -130.5     | 48.77       | 7  | 8  | 2.675  | 26 | 0.0253                    |
|        |                     | HA Veh vs. HA CRH              | 329.1  | 167.5  | 161.6      | 48.77       | 7  | 8  | 3.314  | 26 | 0.008                     |
|        |                     | LA CRH vs. HA CRH              | 262.8  | 167.5  | 95.25      | 47.12       | 8  | 8  | 2.021  | 26 | 0.0536                    |
| 3D     | rewards             | LA Veh vs. HA Veh              | 11     | 13.5   | -2.5       | 0.6645      | 7  | 8  | 3.762  | 26 | 0.0027                    |
|        |                     | LA Veh vs. LA CRH              | 11     | 13.86  | -2.857     | 0.6863      | 7  | 7  | 4.163  | 26 | 0.0018                    |
|        |                     | HA Veh vs. HA CRH              | 13.5   | 12     | 1.5        | 0.6419      | 8  | 8  | 2.337  | 26 | 0.0274                    |
|        |                     | LA CRH vs. HA CRH              | 13.86  | 12     | 1.857      | 0.6645      | 7  | 8  | 2.795  | 26 | 0.019                     |
| 5C     | breakpoint          | mis. ctr vs. AON ctr           | 36.86  | 32.29  | 4.571      | 10.78       | 7  | 7  | 0.4241 | 24 | 0.6752                    |
|        |                     | mis. ctr vs. mis. stress       | 36.86  | 67.14  | -30.29     | 10.78       | 7  | 7  | 2.81   | 24 | 0.0382                    |
|        |                     | AON ctr vs. AON stress         | 32.29  | 22.86  | 9.429      | 10.78       | 7  | 7  | 0.8748 | 24 | 0.6283                    |
|        |                     | mis. stress vs. AON stress     | 67.14  | 22.86  | 44.29      | 10.78       | 7  | 7  | 4.109  | 24 | 0.0024                    |
| 5D     | correct nosepones   | mis. ctr vs. AON ctr           | 147.4  | 127.3  | 20.14      | 48.68       | 7  | 7  | 0.4138 | 24 | 0.6741                    |
|        |                     | mis. ctr vs. mis. stress       | 147.4  | 284.6  | -137.1     | 48.68       | 7  | 7  | 2.817  | 24 | 0.0283                    |
|        |                     | AON ctr vs. AON stress         | 127.3  | 91     | 36.29      | 48.68       | 7  | 7  | 0.7454 | 24 | 0.9266                    |
|        |                     | mis. stress vs. AON stress     | 284.6  | 91     | 193.6      | 48.68       | 7  | 7  | 3.976  | 24 | 0.0024                    |
| 5E     | rewards             | mis. ctr vs. AON ctr           | 11.43  | 11     | 0.4286     | 0.8165      | 7  | 7  | 0.5249 | 24 | 0.597                     |
|        |                     | mis. ctr vs. mis. stress       | 11.43  | 13.29  | -1.857     | 0.8165      | 7  | 7  | 2.275  | 24 | 0.064                     |
|        |                     | AON ctr vs. AON stress         | 11     | 10.14  | 0.8571     | 0.8165      | 7  | 7  | 1.05   | 24 | 0.9129                    |
|        |                     | mis. stress vs. AON stress     | 13.29  | 10.14  | 3.143      | 0.8165      | 7  | 7  | 3.849  | 24 | 0.0031                    |
| 6B     | breakpoint          | GFP ctr vs. CRHR1OE ctr        | 26.75  | 63.11  | -36.36     | 9.859       | 12 | 9  | 3.688  | 38 | 0.0014                    |
|        |                     | GFP stress vs. CRHR1 OE stress | 30.17  | 55.67  | -25.5      | 9.859       | 12 | 9  | 2.586  | 38 | 0.0271                    |
| 6C     | correct nosepones   | GFP ctr vs. CRHR1 OE ctr       | 109.75 | 261.11 | -151.4     | 40.28       | 12 | 9  | 3.757  | 38 | 0.0012                    |
|        |                     | GFP stress vs. CRHR1 OE stress | 125.92 | 224.67 | -98.75     | 40.28       | 12 | 9  | 2.451  | 38 | 0.0375                    |
| 6D     | rewards             | GFP ctr vs. CRHR1OE ctr        | 10.58  | 12.89  | -2.306     | 0.6661      | 12 | 9  | 3.461  | 38 | 0.0027                    |
|        |                     | GFP stress vs. CRHR1 OE stress | 10.92  | 12.67  | -1.75      | 0.6661      | 12 | 9  | 2.627  | 38 | 0.0245                    |
| 6F     | breakpoint          | WT - KO                        |        |        |            |             |    |    |        |    |                           |
|        |                     | Control                        | 14     | 11.14  | 2.857      | 4.405       | 15 | 7  | 0.6486 | 40 | 0.5203                    |
|        |                     | Stress                         | 19.07  | 5.857  | 13.21      | 4.405       | 15 | 7  | 2.999  | 40 | 0.0093                    |
|        |                     | Control - Stress               |        |        |            |             |    |    |        |    |                           |
| 6G     | correct nosepones   | WT                             | 14     | 19.07  | -5.067     | 2.061       | 15 | 15 | 2.458  | 20 | 0.0459                    |
|        |                     | KO                             | 11.14  | 5.857  | 5.286      | 3.017       | 7  | 7  | 1.752  | 20 | 0.0951                    |
|        |                     | Control                        | 78.73  | 55     | 23.73      | 32.19       | 15 | 7  | 0.7372 | 40 | 0.7141                    |
|        |                     | Stress                         | 116.3  | 24.14  | 92.12      | 32.19       | 15 | 7  | 2.861  | 40 | 0.0133                    |
| 6H     | rewards             | Control - Stress               |        |        |            |             |    |    |        |    |                           |
|        |                     | WT                             | 78.73  | 116.3  | -37.53     | 15.97       | 15 | 15 | 2.35   | 20 | 0.0574                    |
|        |                     | KO                             | 55     | 24.14  | 30.86      | 23.38       | 7  | 7  | 1.32   | 20 | 0.3628                    |
|        |                     | Control                        | 9.8    | 8      | 1.8        | 1.675       | 15 | 7  | 1.075  | 40 | 0.2889                    |
| S1D    | incorrect nosepones | Stress                         | 11.6   | 5.286  | 6.314      | 1.675       | 15 | 7  | 3.77   | 40 | 0.002                     |
|        |                     | Control - Stress               |        |        |            |             |    |    |        |    |                           |
|        |                     | WT                             | 9.8    | 11.6   | -1.8       | 0.7996      | 15 | 15 | 2.251  | 20 | 0.0707                    |
|        |                     | KO                             | 8      | 5.286  | 2.714      | 1.171       | 7  | 7  | 2.319  | 20 | 0.0926                    |
| S1G    | breakpoint          | LA ctr vs. HA ctr              | 15.55  | 21.6   | -6.055     | 4.339       | 11 | 10 | 1.395  | 36 | 0.5109                    |
|        |                     | LA ctr vs. LA stress           | 15.55  | 10.1   | 5.445      | 4.339       | 11 | 10 | 1.255  | 36 | 0.4297                    |
|        |                     | HA ctr vs. HA stress           | 21.6   | 6.444  | 15.16      | 4.563       | 10 | 9  | 3.322  | 36 | 0.0082                    |
|        |                     | LA stress vs. HA stress        | 10.1   | 6.444  | 3.656      | 4.563       | 10 | 9  | 0.8012 | 36 | 0.4283                    |
| S1H    | correct nosepones   | Control - Stress               |        |        |            |             |    |    |        |    |                           |
|        |                     | LA                             | 52.73  | 62     | -9.273     | 4.873       | 11 | 11 | 1.903  | 19 | 0.0723                    |
|        |                     | HA                             | 58.9   | 45.9   | 13         | 5.11        | 10 | 10 | 2.544  | 19 | 0.0392                    |
|        |                     | LA - HA                        |        |        |            |             |    |    |        |    |                           |
| S1I    | rewards             | Control                        | 52.73  | 58.9   | -6.173     | 14.96       | 11 | 10 | 0.4126 | 38 | 0.6822                    |
|        |                     | Stress                         | 62     | 45.9   | 16.1       | 14.96       | 11 | 10 | 1.076  | 38 | 0.494                     |
|        |                     | Control - Stress               |        |        |            |             |    |    |        |    |                           |
|        |                     | LA                             | 196.5  | 257.8  | -61.36     | 13.79       | 11 | 11 | 4.45   | 19 | 0.0005                    |
| S2G    | Dopamine            | HA                             | 234.6  | 194.9  | 39.7       | 14.46       | 10 | 10 | 2.745  | 19 | 0.0129                    |
|        |                     | LA - HA                        |        |        |            |             |    |    |        |    |                           |
|        |                     | Control                        | 196.5  | 234.6  | -38.15     | 60.75       | 11 | 10 | 0.6279 | 38 | 0.5338                    |
|        |                     | Stress                         | 257.8  | 194.9  | 62.92      | 60.75       | 11 | 10 | 1.036  | 38 | 0.5196                    |
| S2G    | DOPAC               | Control - Stress               |        |        |            |             |    |    |        |    |                           |
|        |                     | LA                             | 12     | 12.82  | -0.8182    | 0.3284      | 11 | 11 | 2.492  | 19 | 0.0339                    |
|        |                     | HA                             | 12.9   | 12     | 0.9        | 0.3444      | 10 | 10 | 2.613  | 19 | 0.0339                    |
|        |                     | LA - HA                        |        |        |            |             |    |    |        |    |                           |
| S5C    | timeout nosepones   | Control                        | 12     | 12.9   | -0.9       | 0.8036      | 11 | 10 | 1.12   | 38 | 0.4667                    |
|        |                     | Stress                         | 12.82  | 12     | 0.8182     | 0.8036      | 11 | 10 | 1.018  | 38 | 0.4667                    |
|        |                     | LA - HA                        |        |        |            |             |    |    |        |    |                           |
|        |                     | 0                              | 89.42  | 118.5  | -29.03     | 30.05       | 4  | 5  | 0.966  | 35 | 0.5653                    |
|        |                     | 20                             | 119.4  | 96.58  | 22.78      | 30.05       | 4  | 5  | 0.758  | 35 | 0.5653                    |
|        |                     | 40                             | 179.6  | 97.83  | 81.74      | 30.05       | 4  | 5  | 2.72   | 35 | 0.0495                    |
|        |                     | 60                             | 180.9  | 106.3  | 74.56      | 30.05       | 4  | 5  | 2.481  | 35 | 0.0703                    |
|        |                     | 80                             | 185.3  | 112.6  | 72.64      | 30.05       | 4  | 5  | 2.417  | 35 | 0.0703                    |
| S5C    | timeout nosepones   | Control                        | 88.15  | 124.4  | -36.26     | 36.92       | 4  | 5  | 0.9821 | 35 | 0.5548                    |
|        |                     | 20                             | 120.7  | 105.1  | 15.61      | 36.92       | 4  | 5  | 0.4228 | 35 | 0.6751                    |
|        |                     | 40                             | 211.4  | 95.58  | 115.8      | 36.92       | 4  | 5  | 3.138  | 35 | 0.0171                    |
|        |                     | 60                             | 177    | 81.35  | 95.66      | 36.92       | 4  | 5  | 2.591  | 35 | 0.0543                    |
|        |                     | 80                             | 161    | 90.44  | 70.6       | 36.92       | 4  | 5  | 1.912  | 35 | 0.1802                    |
|        |                     | GFP ctr vs. CRHR1 OE ctr       | 6.08   | 24.89  | -18.81     | 5.832       | 12 | 9  | 3.224  | 38 | 0.0052                    |
|        |                     | GFP stress vs. CRHR1 OE stress | 7.42   | 20.89  | -13.47     | 5.832       | 12 | 9  | 2.31   | 38 | 0.0521                    |

**Table S1. Details on statistical tests.** Details from the *post hoc* Holm-Sidak's tests performed in datasets for which a Two-way ANOVA revealed a significant difference.

|               | Forward                  | Reverse                   |
|---------------|--------------------------|---------------------------|
| Primer pair 1 | TGAAATCTGCTGCTTACTGAGCCC | TGGGCAAGGAATGCGTACCTCTTA  |
| Primer pair 2 | GCACTTCCCTCCAACAACCCTA   | ACTCTGTTCTCAGCACACTGGACA  |
| Primer pair 3 | ATCGCATGACCTACAGCAACTCCA | TCTTGAGTACCCAGAAGCACCGAA  |
| Primer pair 4 | TGGATCTTGTCCAGTGTGCTGAGA | AACTAAGCGTCTGTCTGTTTGGTC  |
| Primer pair 5 | GCCCGCTGTCTCCACTTATC     | TGCTGAACCTCGTCTCCC        |
| Primer pair 6 | AGAGGAGGGAGAAAGAGGAGGG   | CTTCAGAGATCCAGGTAGAGGACAT |
| Primer pair 7 | CAGCCACCGGAGACCGCAG      | GGTTCACCACCACCCTTTC       |

**Table S2. List of primers.**
